# Supplementary material
Source: publisher figshare collection journal article supplement (https://frontiersin.figshare.com/ndownloader/files/28408320)
Supplement: Supplementary file 1 [file 28408320]

Supplementary Material

# Supplementary Figures

**

**

**Supplementary Figure 1.** Modulation of cell viability bymiR-335. (**A**) qRT-PCR analysis of miR-335 in BV2 cells transfected with a pre-miR-335 or pre-NC for 24 h. (**B**) qRT-PCR analysis of miR-335 in SH-SY5Y cells transfected with a pre-miR-335 or pre-NC for 24 h. (**C**) BV2 cells were transfected with a pre-miR-335 or pre-NC for 24 h and then stimulated with LPS for additional 24 h. (**D**) SH-SY5Y cells with or without overexpression of α-syn were transfected with a pre-miR-335 or pre-NC for 24 h. Cell metabolic activity was determined by MTS metabolism assay and cell membrane integrity by LDH activity in the supernatant. Results are presented as mean ± SEM of three independent experiments performed in duplicates and normalized to control cells transfected with pre-NC.


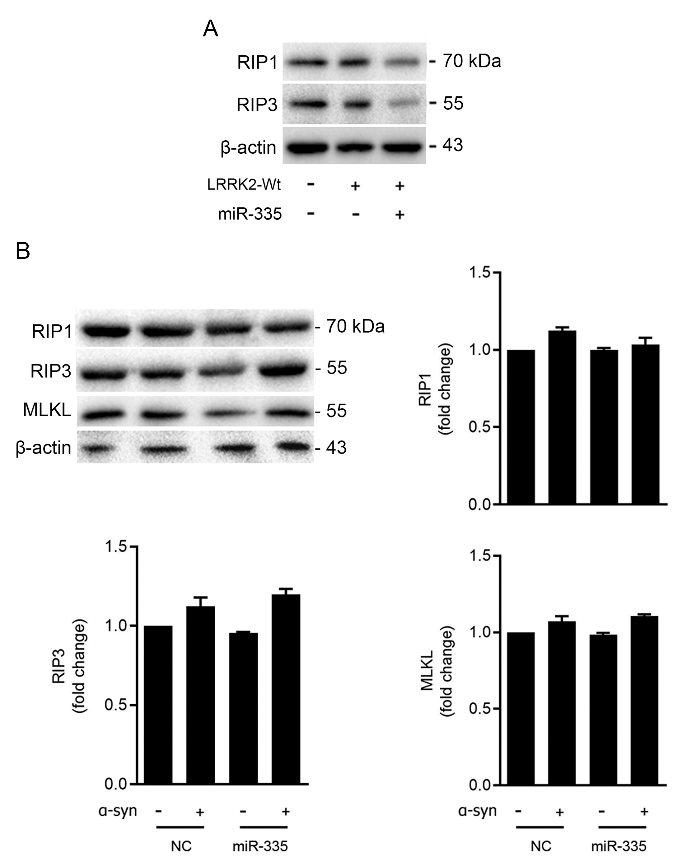


**Supplementary Figure 2** Modulation of RIP1, RIP3 and MLKL by miR-335. (**A**) BV2 cells were co-transfected with a LRRK2-Wt or empty vector plasmid and with a pre-miR-335 or pre-NC for 24 h. (**B**) SH-SY5Y neuroblastoma cells with or without overexpression of α-syn were transfected with pre-miR-335 or pre-NC for 24 h. Total protein extracts were prepared for Western blot analysis of RIP1, RIP3 and MLKL. Representative immunoblots are presented. β-actin was used as loading control. Values are expressed as mean ± SEM of three independent experiments.


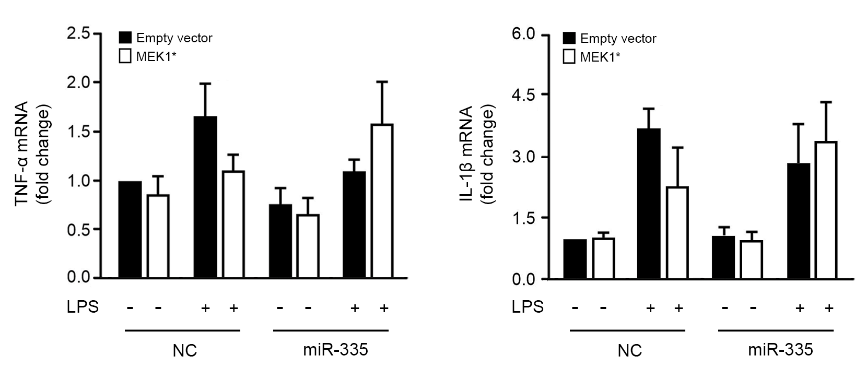


**Supplementary Figure 3** Modulation of proinflammatory mRNA levels by miR-335. BV2 cells were co-transfected with a plasmid encoding a constitutively active form of MEK1 (MEK1*), or empty vector and pre-miR-335/pre-NC for 24 h, and then stimulated with LPS for additional 24 h. TNF-α and IL-1β mRNA levels were measured by qRT-PCR. Results are expressed as mean ± SEM from two independent experiments.


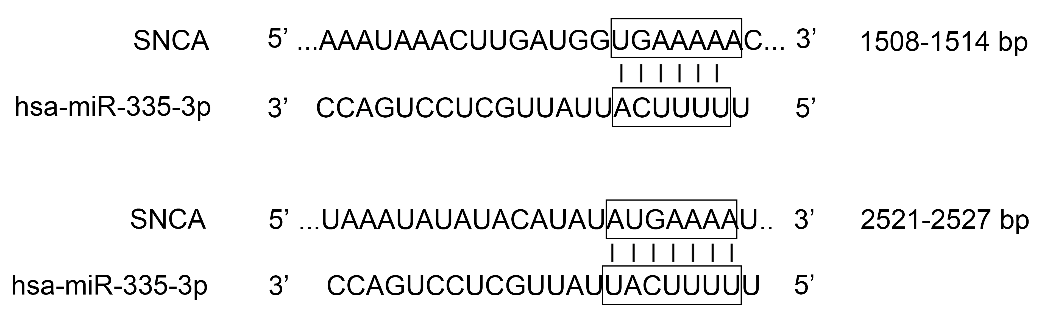


**Supplementary Figure 4** *In silico* analysis of has-miR-335-3p targeting of α-syn (SNCA) 3’-UTR region using TargetScan and PicTar databases.

**
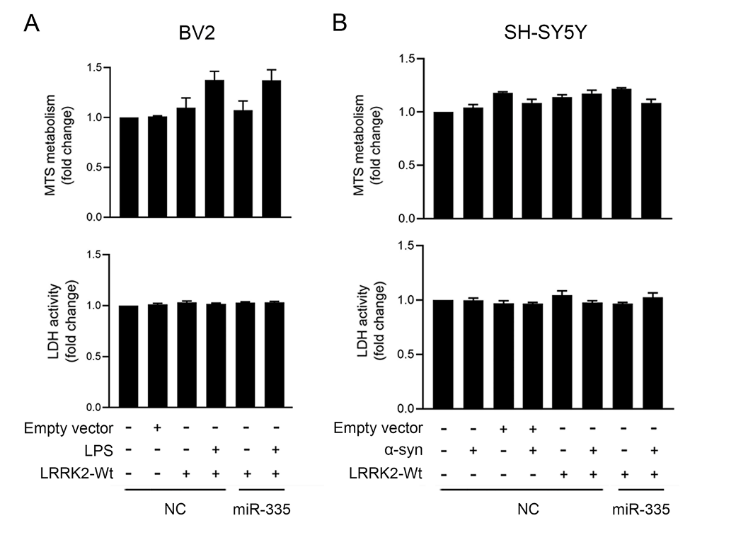
**

**Supplementary Figure 5** Modulation of cell viability by LRRK2-Wt. (**A**) BV2 cells were co-transfected with a LRRK2-Wt or empty vector plasmid and with a pre-miR-335 or pre-NC for 24 h, and then stimulated with LPS for additional 24 h. (**B**) SH-SY5Y cells overexpressing α-syn were co-transfected with a LRRK2-Wt or empty vector plasmid and with a pre-miR-335 or pre-NC for 24 h. Cell metabolic activity was determined by MTS metabolism assay and cell membrane integrity by LDH activity in the supernatant. Results are presented as mean ± SEM of three independent experiments performed in duplicates and normalized to control cells transfected with pre-NC.

# Supplementary Material

**
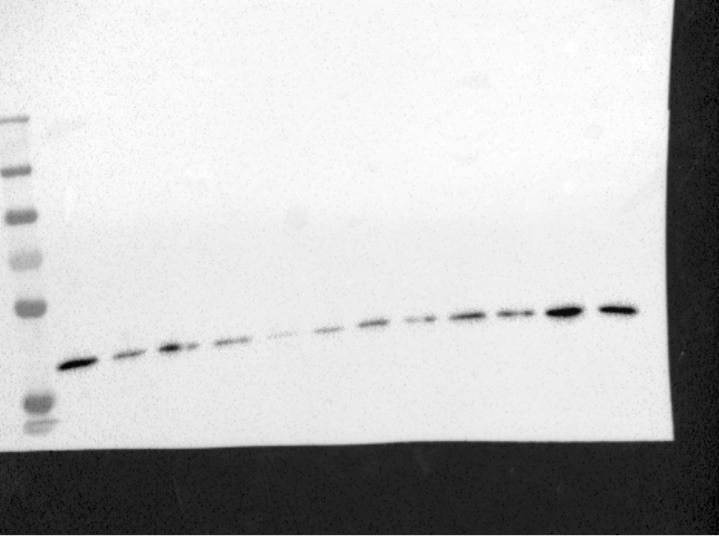
**

**Figure 4**. Original and uncropped blot p-p38.


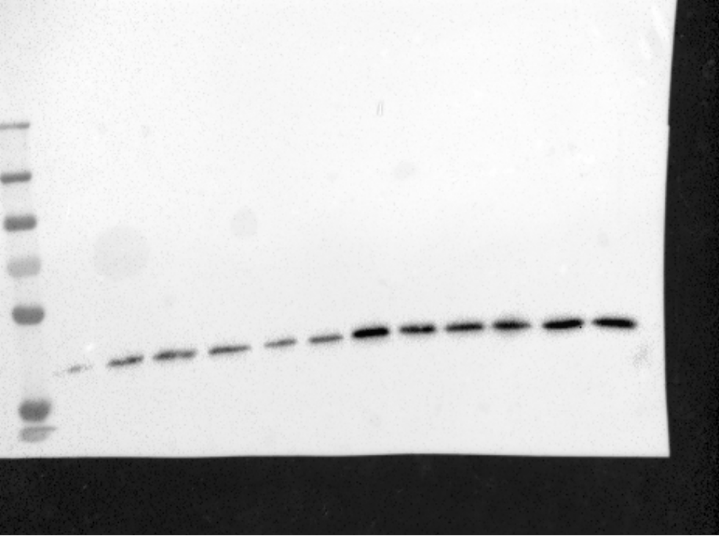


**Figure 4**. Original and uncropped blot p38.


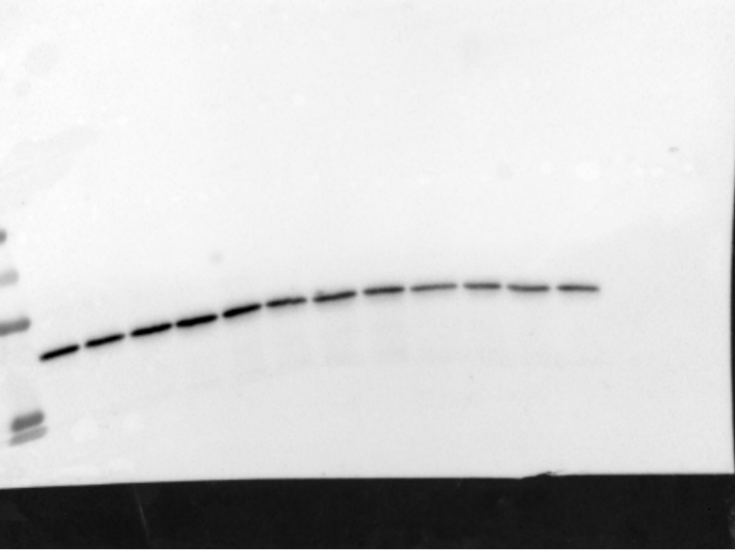


**Figure 4**. Original and uncropped blot p-JNK.


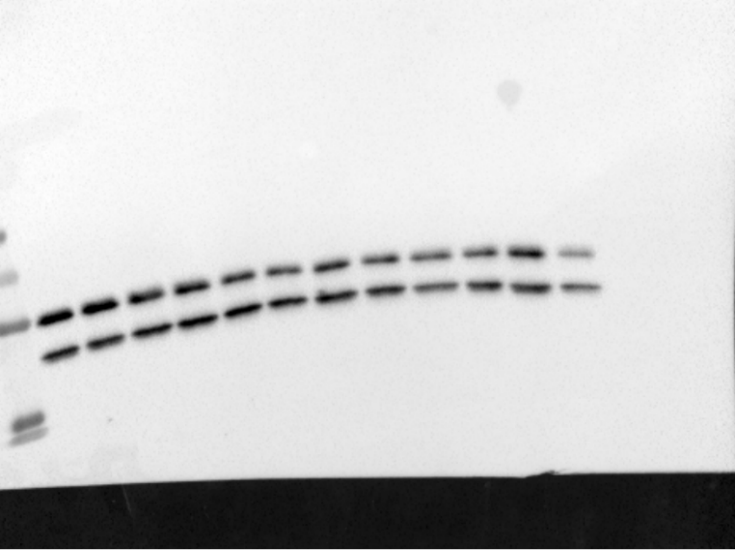


**Figure 4**. Original and uncropped blot JNK.


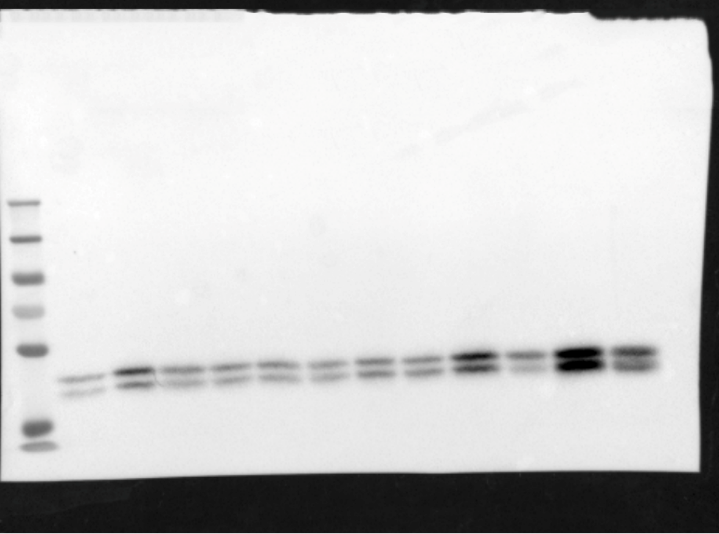


**Figure 4**. Original and uncropped blot p-ERK1/2.


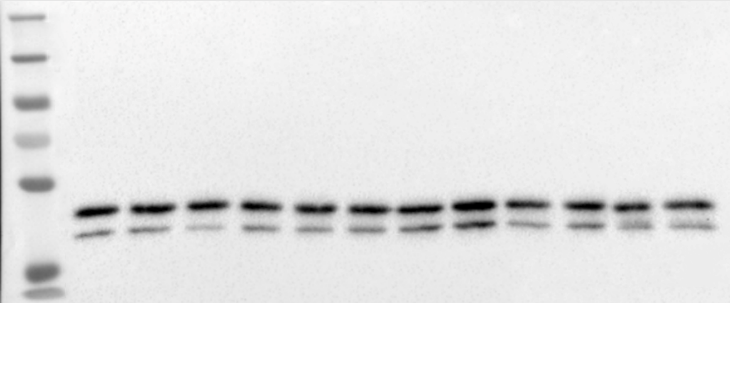


**Figure 4**. Original and uncropped blot ERK1/2.

**
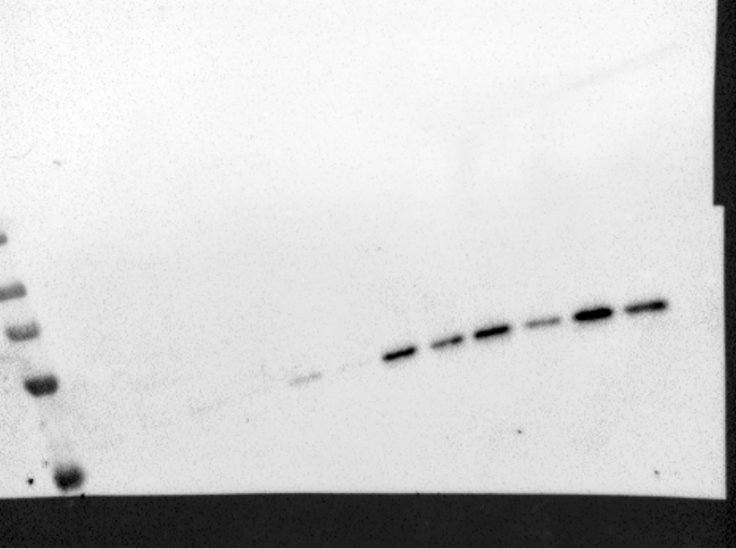
**

**Figure 4**. Original and uncropped blot p-IкB.

**
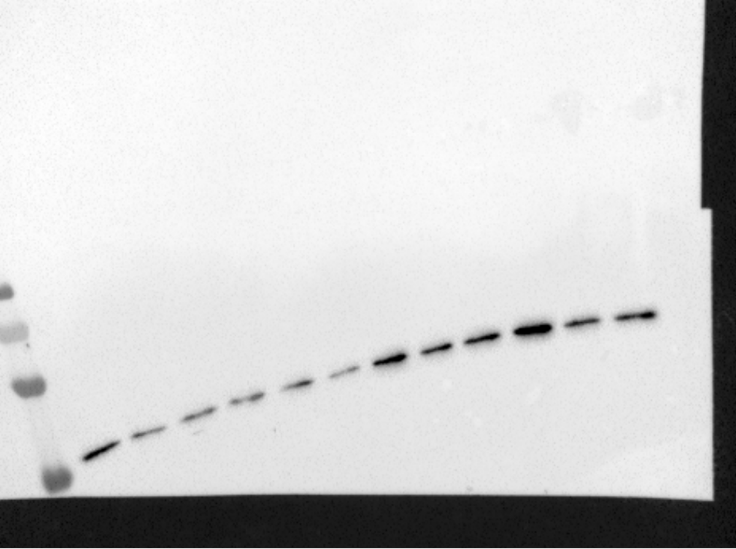
**

**Figure 4**. Original and uncropped blot IкB.
